# Supplementary material for: One-pot synthesis of dispersible thermally stable organic downconversion materials under DBU catalyzation for high performance hybrid-LED lamps
Source: Royal Society of Chemistry journal article supplement (doi:10.1039/c8gc01390j), 2018-01-01
Supplement: c8gc01390j1.pdf [file c8gc01390j1.pdf]

## One-pot synthesize dispersible thermal stable organic downconversion materials under DBU catalyzation for high performance hybrid-LED lamps

Junjie He<sup>a, b</sup>, Shixing, Yang<sup>b</sup>, Kai Zheng<sup>a</sup>, Youming, Zhang<sup>a</sup>, Jun Song<sup>a, \*</sup> and Junle, Qu<sup>a, \*</sup>

a. Key Laboratory of Optoelectronic Devices and Systems of Ministry of Education and Guangdong Province, College of Optoelectronic Engineering, Shenzhen University, Shenzhen 518060, China

b. Yunnan Haiding CO., LTD, Kunming, 650051, China

**Table S 1** Target products yield of the reaction under different catalyst.

|                | Catalyst        | Na <sub>2</sub> CO <sub>3</sub> | K <sub>2</sub> CO <sub>3</sub> | pyridine | triethylamine | DBU |
|----------------|-----------------|---------------------------------|--------------------------------|----------|---------------|-----|
| <b>Product</b> | PER-G yield (%) | 0                               | 0                              | 0        | 0             | 84  |
|                | PER-Y yield (%) | 0                               | trace                          | 0        | 0             | 74  |

All of the reactions were conducted using DMSO as solvent.

**Table S 2** Some key physical properties of the ODMs and their solubility in different solvents.

|              | Wavelength of maximum absorption peak (nm) | Wavelength of maximum emission peak (nm)          | Solubility in different solvents <sup>#</sup> |                 |               |         |          |
|--------------|--------------------------------------------|---------------------------------------------------|-----------------------------------------------|-----------------|---------------|---------|----------|
|              |                                            |                                                   | hexane                                        | dichloromethane | Ethyl acetate | ethanol | methanol |
|              |                                            | /relative quantum yield $\Phi_f$ (%) <sup>*</sup> |                                               |                 |               |         |          |
| <b>PER-G</b> | 472                                        | 492/72                                            | 2                                             | 4               | 3             | 1       | 0        |
| <b>PER-Y</b> | 526                                        | 542/99                                            | 2                                             | 4               | 3             | 1       | 0        |
| <b>PER-R</b> | 547                                        | 578/97                                            | 4                                             | 4               | 4             | 0       | 0        |
| <b>DCPDI</b> | 515                                        | 543/100                                           | 1                                             | 1               | 1             | 0       | 0        |

\* The absorption and fluorescence data were obtained from the diluted ethyl acetate solution ( $10^{-5}$  M). Quantum yields were obtained using relative method, in which N, N'-dicyclohexyl perylene-3, 4, 9, 10-tetracarboxydiimide was used as standard with 100% quantum yield, error  $\pm 2\%$ .<sup>[2]</sup>

<sup>#</sup> Concentration of ODMs was obtained in different solvents. 0: insoluble; 1: less than 1 mg ml<sup>-1</sup>; 2: 10-15 mg ml<sup>-1</sup>; 3: 20-30 mg ml<sup>-1</sup>; 4: >40 mg ml<sup>-1</sup>.

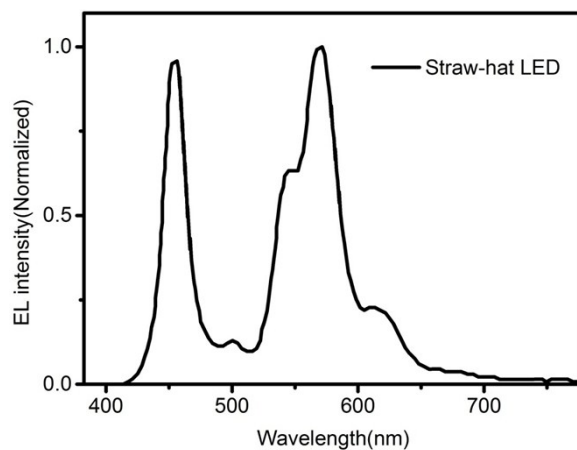

**Figure S 1** The emission spectrum of a white straw-hat LED. Its chromaticity coordinates(x, y) are 0.357, 0.357 respectively.

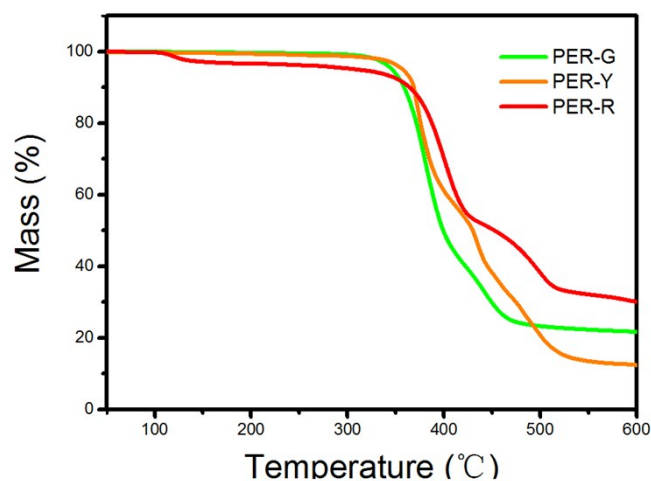

**Figure S 2** TGA curves of the OMDs in this study. The heating rate was 10 °C and nitrogen was used as inert gas flow for all of them

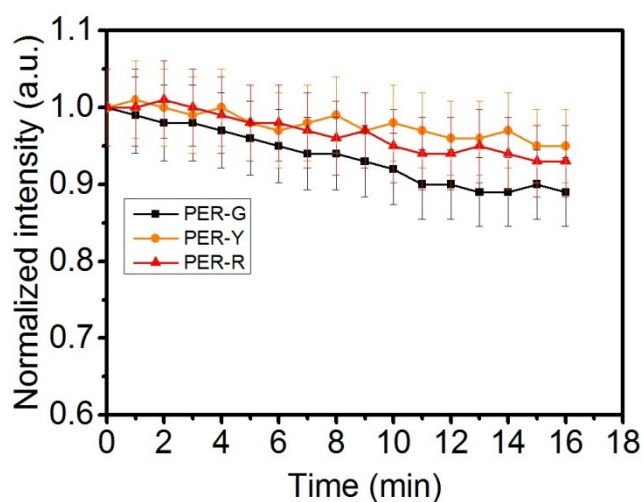

**Figure S 3** Photoluminescent intensity of OMDs in melted polycarbonate in chamber of injection molding machine after different time.

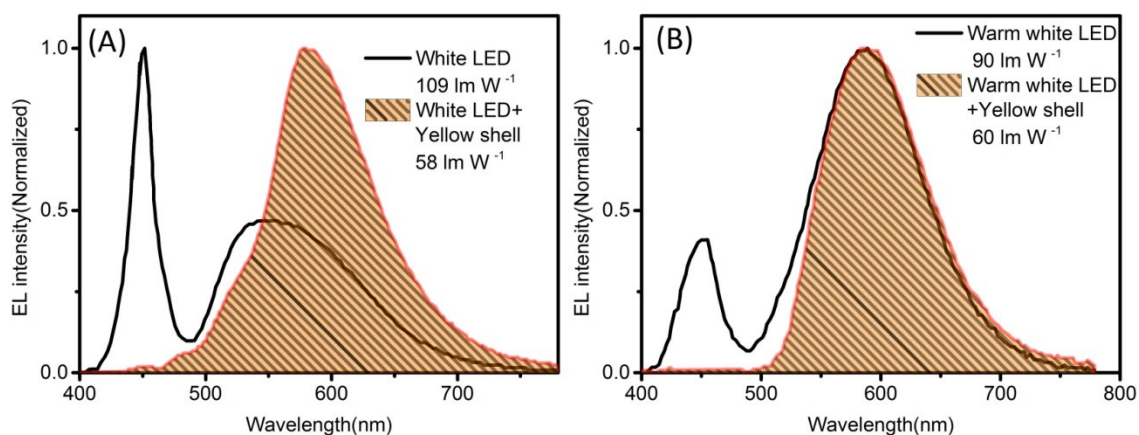

**Figure S 4.** Spectra of yellow lamp (filled area) made by the approach on the market filtering out blue light from a cold white LED array (A) and warm white LED array (B).

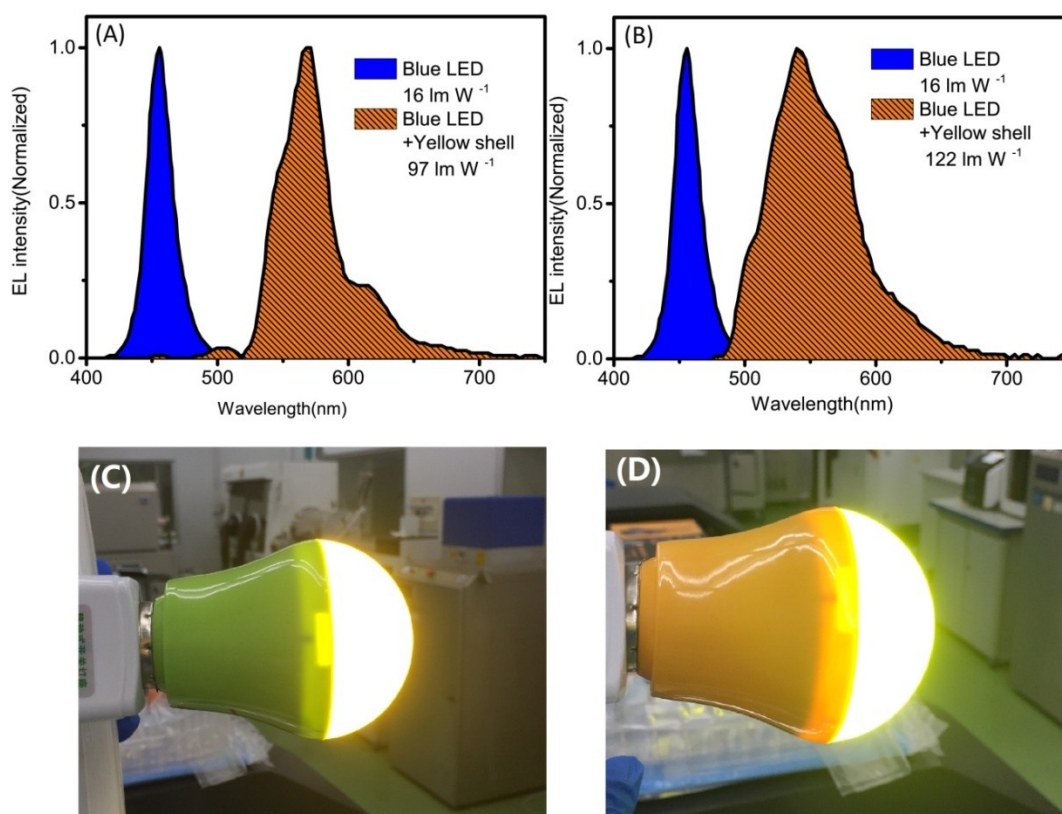

**Figure S 5** Emission spectra before (blue) and after (brown) covering the blue LED array with a lampshade composed of (A) the proposed ODM and (B) different ODM composition. (C) and (D) show the related devices.

## Reference

- [1] a) P. Rajasingh, R. Cohen, E. Shirman, L. J. W. Shimon, B. Rybtchinski, *J. Org. Chem.* **2007**, *72*, 5973; b) M. Queste, C. Cadiou, B. Pagoaga, L. Giraudet, N. Hoffmann, *New J. Chem.* **2010**, *34*, 2537. c) J. Feng, Y. Zhang, C. Zhao, R. Li, W. Xu, X. Li, J. Jiang, *Chem.-Eur. J.* **2008**, *14*, 7000.
- [2] a) M. Lin, Á. Jiméenez, C. Burschka, F. Würthner, *Chem. Commun.*, **2012**, *48*, 12050–12052; b) D. Ozdal, N. Aydinlik, J. Bodapati H. Icil, *Photochem. Photobiol. Sci.*, **2017**, *16*, 262-270; c) J. He, S. Li, and H. Zeng, *J. Heterocyclic Chem.* **2017**, *54*, 2800;
